# Supplementary material for: Long Non-coding RNA EPIC1 Promotes Cell Proliferation and Motility and Drug Resistance in Glioma
Source: PubMed Central journal article supplement (PMC7163045; doi:10.1016/j.omto.2020.03.011), 2020-03-30
Supplement: mmc1.pdf [file mmc1.pdf]

**OMTO, Volume 17**

**Supplemental Information**

**Long Non-coding RNA EPIC1 Promotes  
Cell Proliferation and Motility  
and Drug Resistance in Glioma**

**Jianjiao Wang, Shuguang Yang, Qiongyu Ji, Qingsong Li, Fenggang Zhou, Yang Li, Fei Yuan, Jie Liu, Yu Tian, Yan Zhao, and Yongri Zheng**

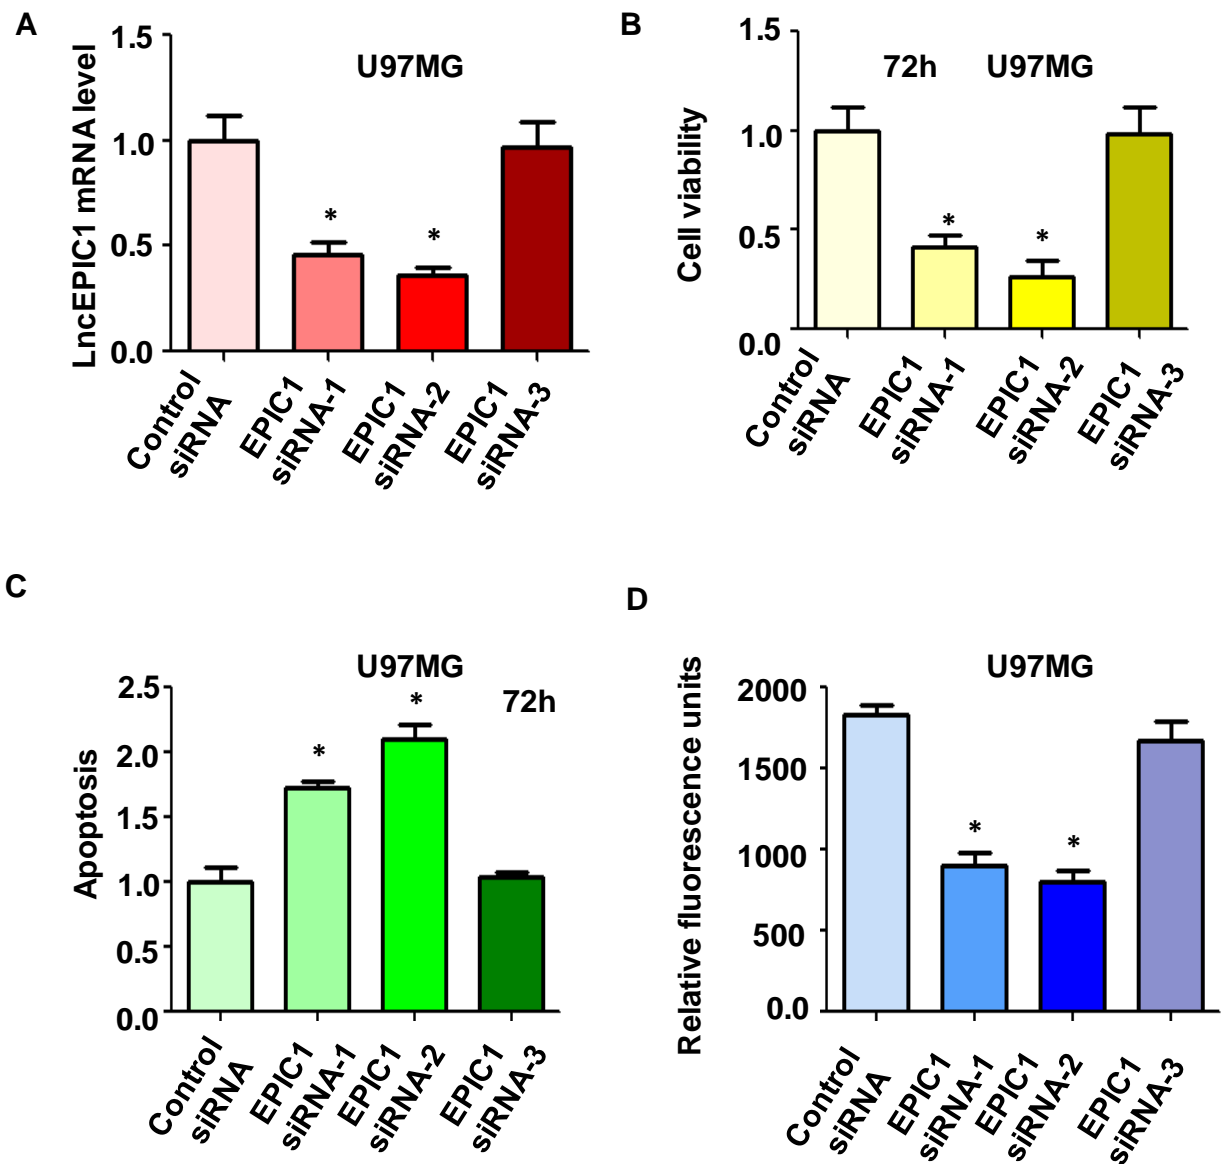

**Supplementary Figure 1: Effect of EPIC1 downregulation on cell viability, apoptosis and invasion in U97MG cells.**

**A**, Real-time PCR was utilized to test EPIC1 expression in U97MG cells after EPIC1 siRNA transfection.

**B**, MTT assay was utilized to measure cell viability in U97MG cells after EPIC1 siRNA transfection for 72h.

**C**, Apoptosis was examined in U97MG cells after EPIC1 siRNA transfection.

**D**, Cell invasion assay was used to test the invasiveness of U97MG cells after EPIC1 siRNA transfection. \*  $p < 0.05$  vs control siRNA.

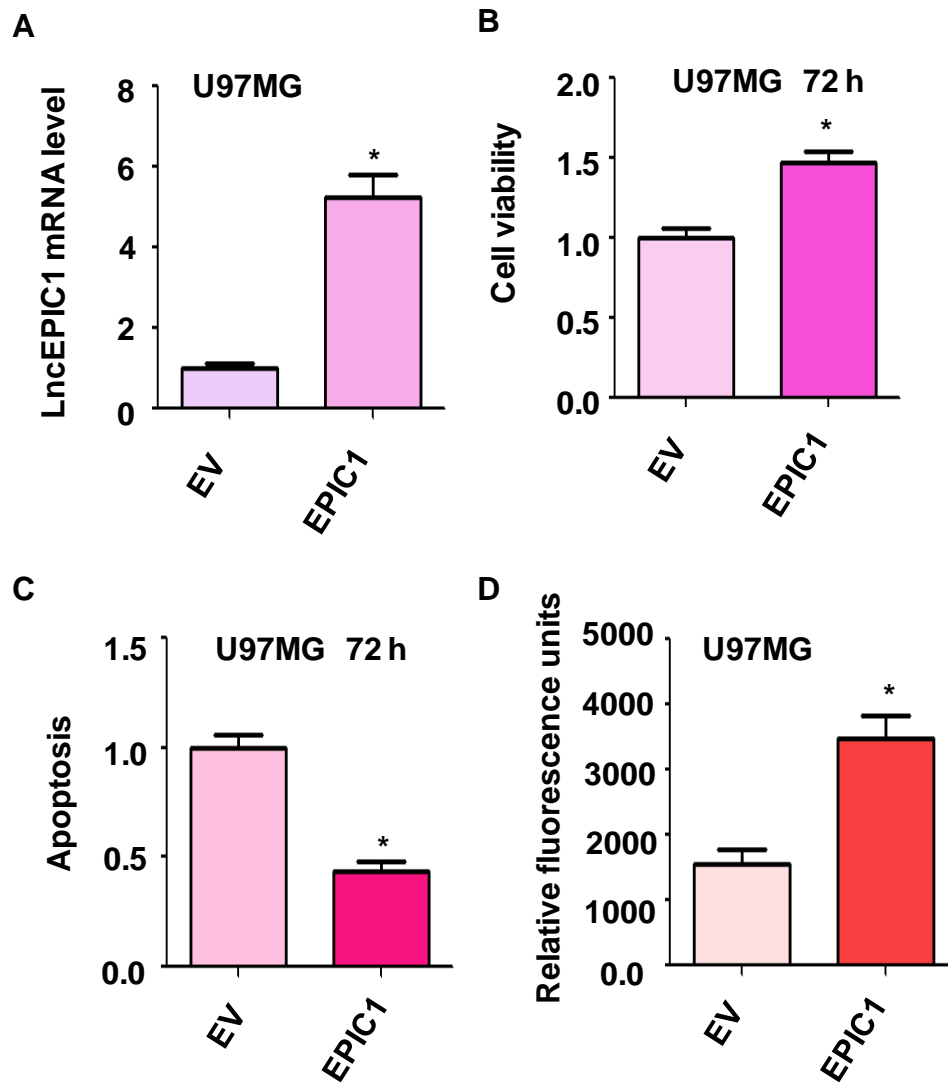

**Supplementary Figure 2: Effect of EPIC1 overexpression on cell viability, apoptosis and invasion in U97MG cells.**

**A**, Real-time PCR was used to test EPIC1 level in U97MG cells after infection with recombinant lentiviruses containing full length of EPIC1. EV: empty vector.

**B**, MTT assay was used to test cell viability in U97MG cells after EPIC1 overexpression.

**C**, Apoptosis was tested in U97MG cells after overexpression of EPIC1.

**D**, Cell invasion assay was used to test the invasiveness of U97MG cells with EPIC1 overexpression. \*  $p < 0.05$  vs EV.

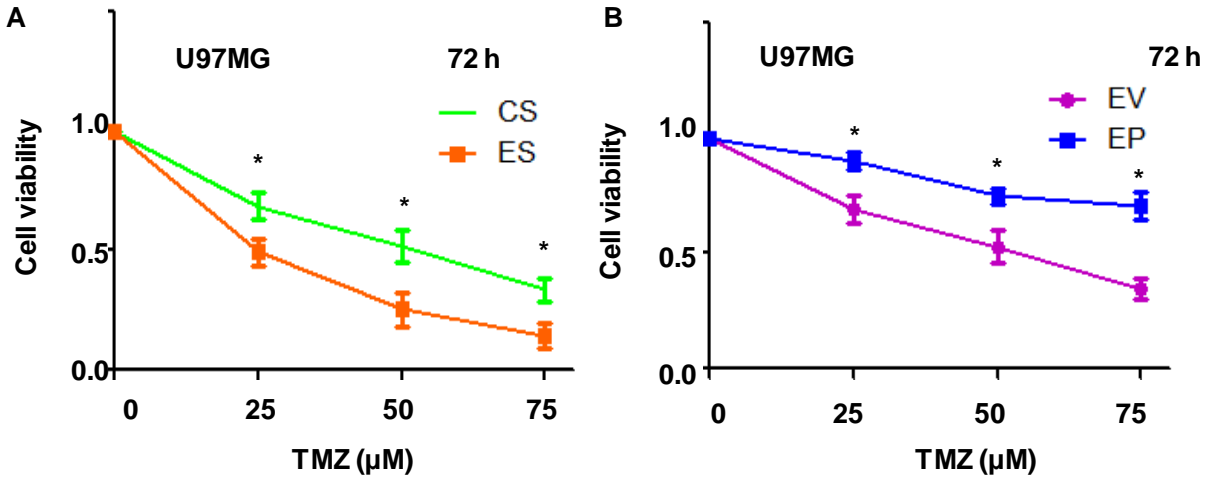

**Supplementary Figure 3: EPIC1 inhibition enhances TMZ sensitivity.**

**A.** MTT assay was performed in U97MG cells following treatments with EPIC1 siRNA and TMZ exposures.

**B.** MTT assay was utilized in U97MG cells after EPIC1 lentivirus infection and TMZ treatment.

\*  $p < 0.05$  vs control.

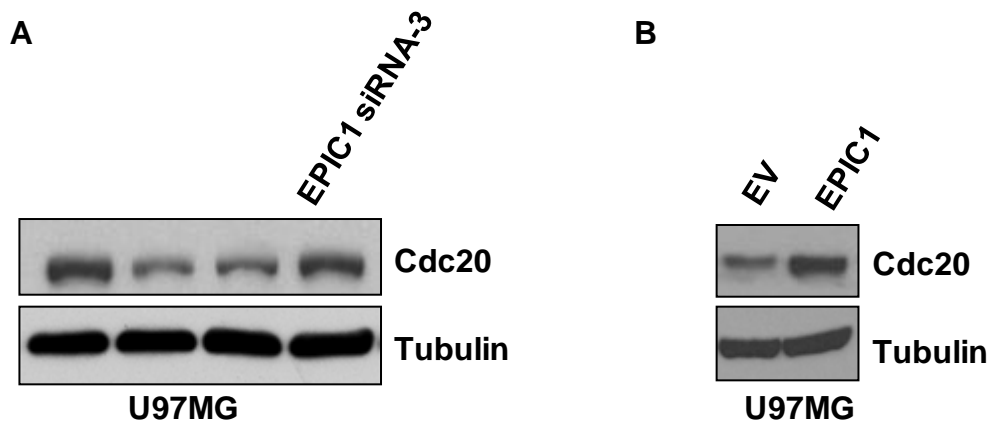

**Supplementary Figure 4: LncRNA EPIC1 affects the expression of Cdc20 in U97MG cells.**

**A,** Western blotting analysis was used to measure the expression of Cdc20 in U97MG cells after EPIC1 downregulation.

**B,** Western blotting analysis was used to measure the expression of Cdc20 in U97MG cells after EPIC1 overexpression.

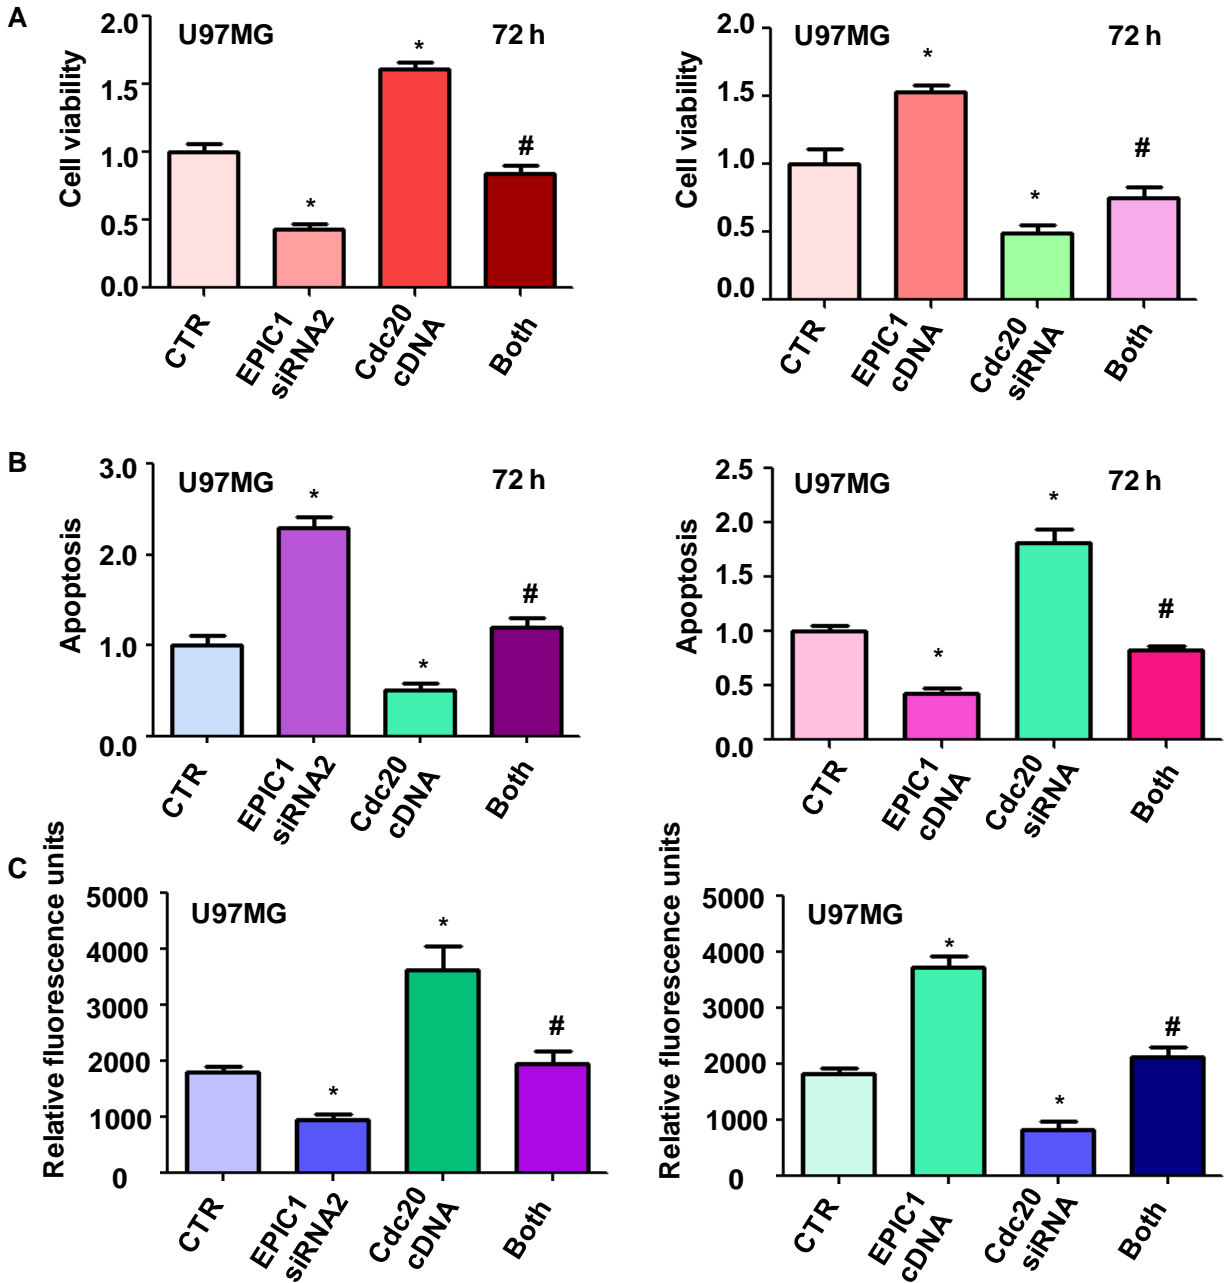

**Supplementary Figure 5: Overexpression of Cdc20 reverses the EPIC1 siRNA-mediated tumor suppression.**

**A**, MTT was used to measure viability in U97MG cells after modulation of EPIC1 and Cdc20.

**B**, Cell apoptosis was performed in U97MG cells after modulation of EPIC1 and Cdc20.

**C**, Cell invasion was conducted in U97MG cells after modulation of EPIC1 and Cdc20.

CTR: Control. Both: EPIC1 change and Cdc20 change. \*  $p < 0.05$  vs CTR. #  $p < 0.05$  vs EPIC1 change alone or Cdc20 change alone.
